# Supplementary material for: Waldenström’s Macroglobulinemia in a Normoproteinemic Dog with Atypical Bimorphic Plasmacytoid Differentiation and Monoclonal Gammopathy
Source: MDPI journal article supplement (doi:10.3390/vetsci10050355), 2023-05-16

Serum protein immunofixation electrophoresis from a Small Munsterlander dog with Waldenström's macroglobulinemia.

- ELP: no antisera / nonspecific staining
- 2: heavy chains (G, A, M) polyclonal antisera
- 3: anti-IgG4 canine antisera
- 4: anti-IgA canine antisera
- 5: anti-IgM canine antisera
- 6: anti-total bound light chains canine antisera
- 7: anti-free and bound kappa light chains antisera
- 8: anti-free and bound lambda light chains antisera

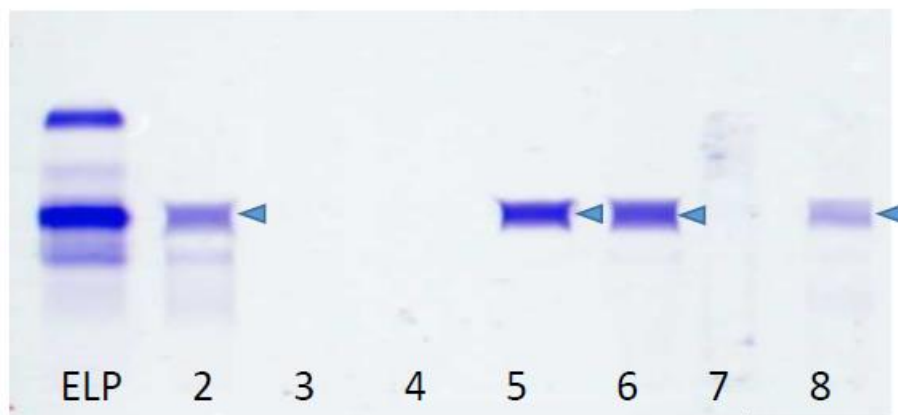

Supplement: s1 [file s1]
