# Supplementary material for: Waldenström’s Macroglobulinemia in a Normoproteinemic Dog with Atypical Bimorphic Plasmacytoid Differentiation and Monoclonal Gammopathy
Source: MDPI journal article supplement (doi:10.3390/vetsci10050355), 2023-05-16

Urine protein immunofixation electrophoresis from a Small Munsterlander dog with Waldenström's macroglobulinemia.

ELP: no antisera / nonspecific staining

2: heavy chains (G, A, M) polyclonal antisera

3: anti-free and bound kappa light chains antisera

4: anti-free and bound lambda light chains antisera

5: anti-total bound light chains canine antisera

6: anti-IgM canine antisera

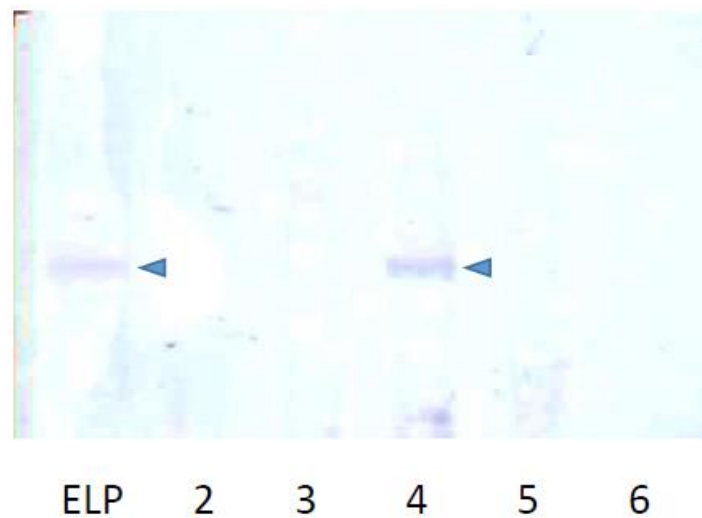

Supplement: s1 [file s1]
