# Supplementary material for: Waldenström’s Macroglobulinemia in a Normoproteinemic Dog with Atypical Bimorphic Plasmacytoid Differentiation and Monoclonal Gammopathy
Source: MDPI journal article supplement (doi:10.3390/vetsci10050355), 2023-05-16

Agarose gel serum protein electrophoresis from a Small Munsterlander dog with Waldenström's macroglobulinemia and other patients (Hydrasys; SEBIA, France).

Controls are on the far left: Normal control (lane 1, "N") and Hypergammaglobulinemia control (lane 2, "H").

The Small Munsterlander dog with Waldenström's macroglobulinemia is represented on the lane 3 (identification number "5806") and shows one intense and restricted band corresponding to the  $\alpha_2$  globulin fraction.

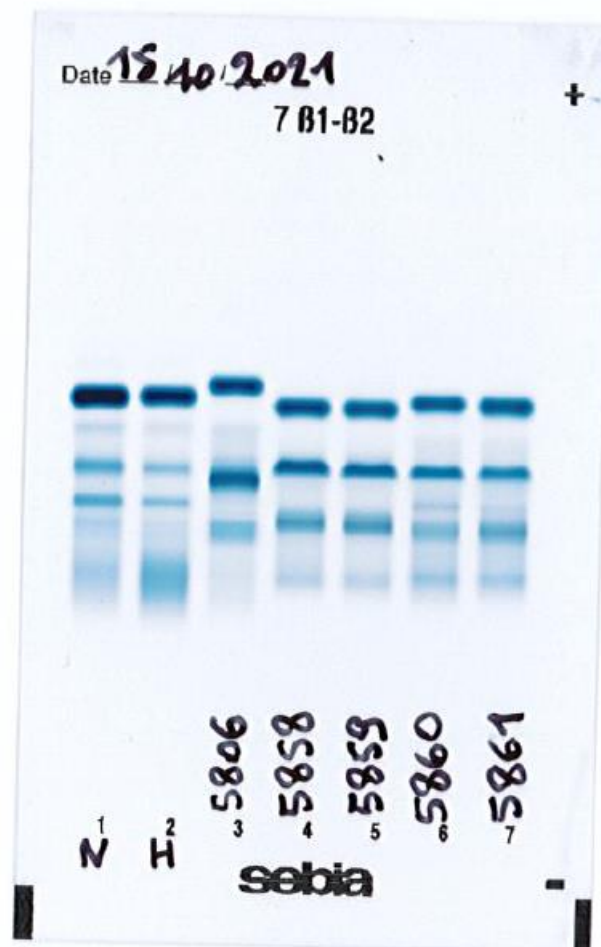

Supplement: s1 [file s1]
